# Supplementary material for: Alterations in Cerebrospinal Fluid Proteins in a Presymptomatic Primary Glioma Model
Source: PLOS journal article supplement (doi:10.1371/journal.pone.0049724), 2012-11-19

Non-Reduced unmodified, Cys- and Glutathionylated-modification  
of Arg C-digested Transthyretin band  
GPGGAGESK**C**PLMKVLDVR

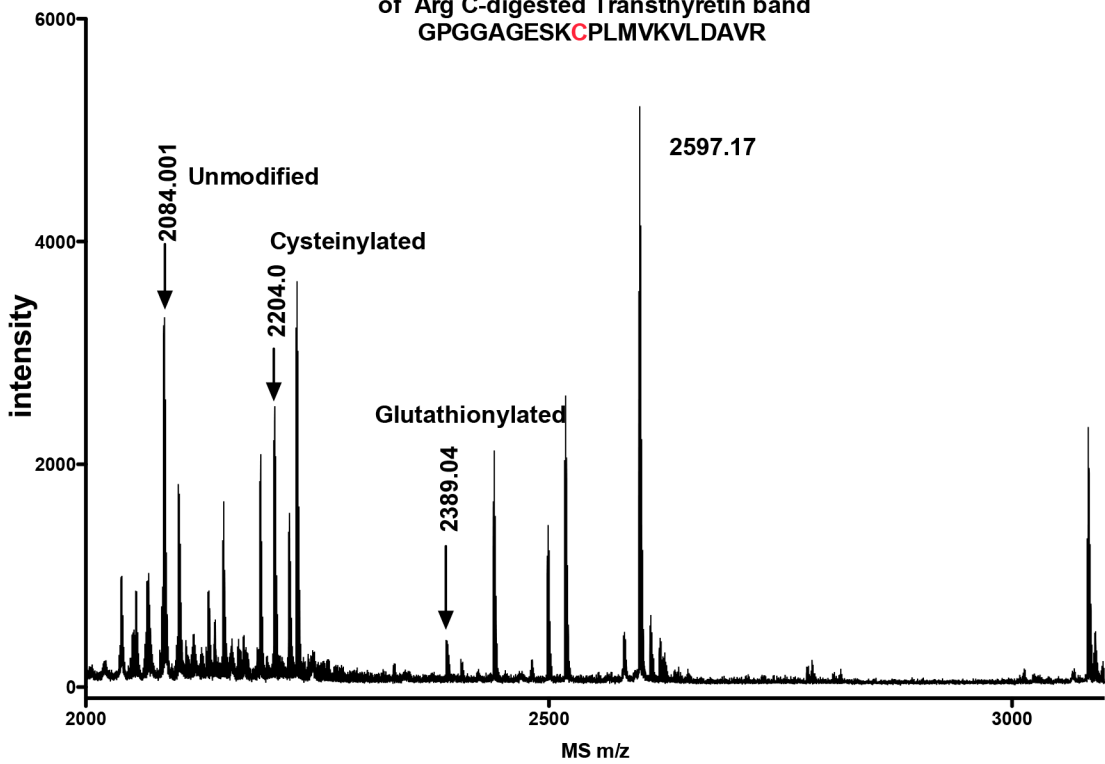

Reduced/Alkylated MS of Arg C-digested Transthyretin band

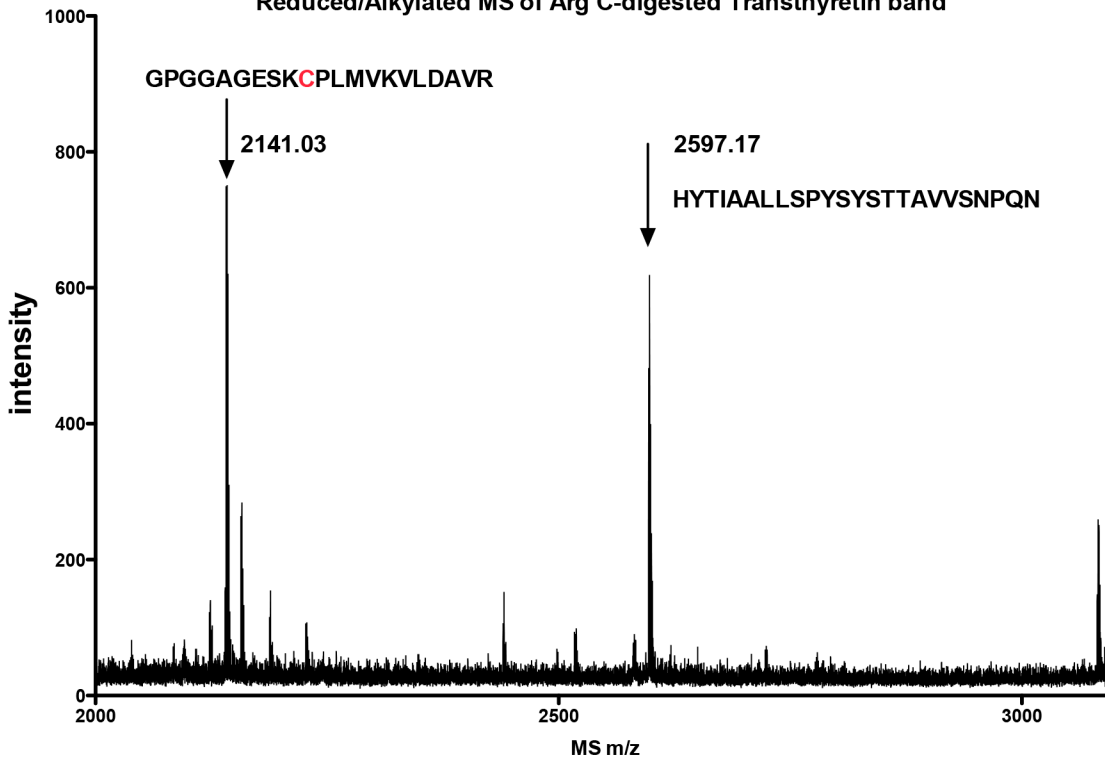

Supplement: S4 (10.1371/journal.pone.0049724.s004) [file journal.pone.0049724.s004]
